# Supplementary material
Source: PubMed Central journal article supplement (PMC4806888)

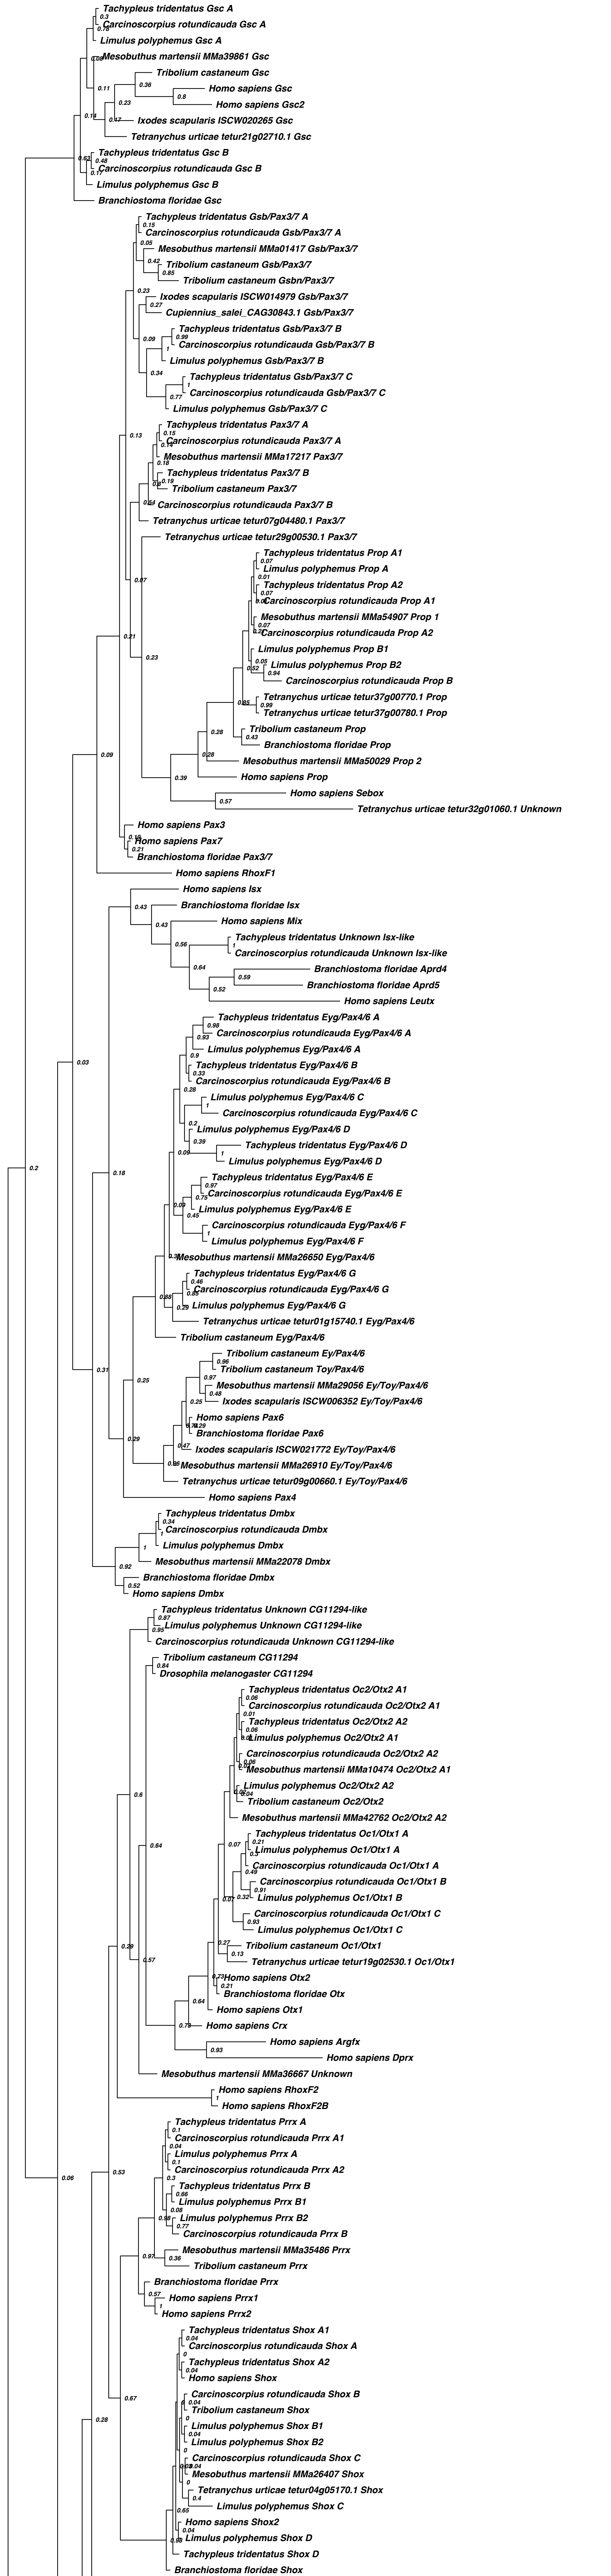

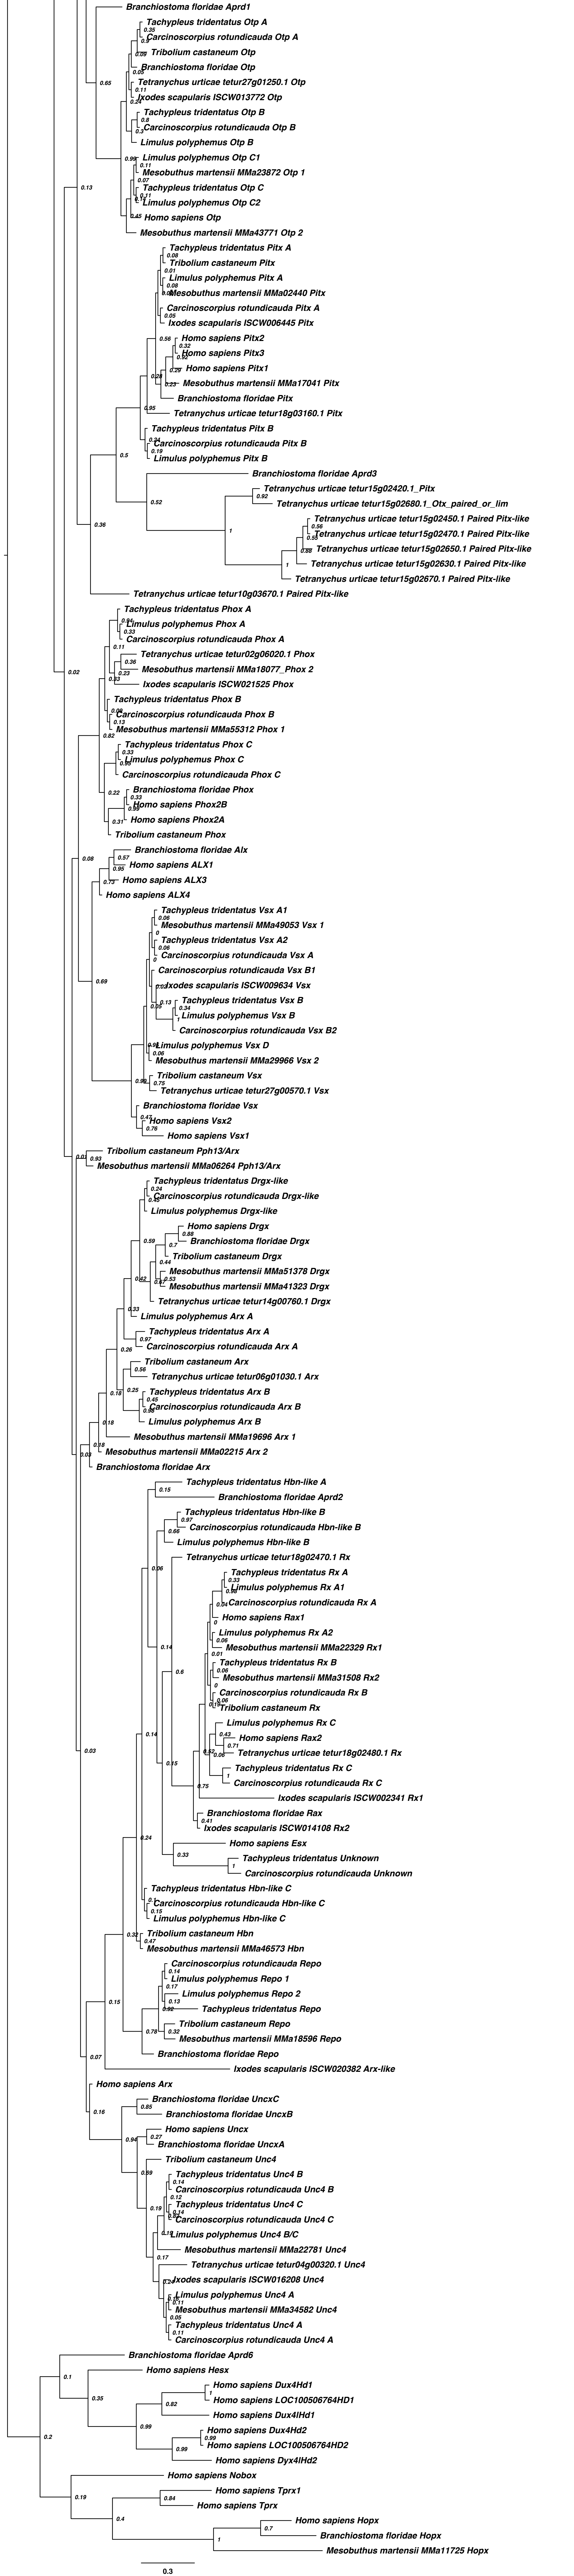

Supplement: hdy201589x4.pdf [file hdy201589x4.pdf]
